# Supplementary material for: Lophiostomin A–D: new 3,4-dihydroisocoumarin derivatives from the endophytic fungus Lophiostoma sp. Sigrf10
Source: Royal Society of Chemistry journal article supplement (doi:10.1039/d0ra00538j), 2020-01-01
Supplement: d0ra00538j1.pdf [file d0ra00538j1.pdf]

## Supplementary Information

### **Lophiostomins A-D, new 3,4-dihydroisocoumarin derivatives from the endophytic fungus *Lophiostoma* sp. Sigrf10**

Ziling Mao,<sup>a</sup> Mengyao Xue,<sup>a</sup> Gan Gu,<sup>a</sup> Weixuan Wang,<sup>a</sup> Dianpeng Li,<sup>b</sup> Daowan Lai,<sup>\*a</sup> and Ligang Zhou <sup>\*a</sup>

<sup>a</sup> Department of Plant Pathology, College of Plant Protection, China Agricultural University, Beijing 100193, China; E-mail: [dwlai@cau.edu.cn](mailto:dwlai@cau.edu.cn) (D.L.); [lgzhou@cau.edu.cn](mailto:lgzhou@cau.edu.cn) (L.Z)

<sup>b</sup> Guangxi Key Laboratory of Functional Phytochemicals Research and Utilization, Guangxi Institute of Botany, Guilin 541006, China

## Table of contents

|                                                                                                                                                                                         |    |
|-----------------------------------------------------------------------------------------------------------------------------------------------------------------------------------------|----|
| <b>Figure S1.</b> The optimized, predominant conformers of <b>1</b> calculated at the B3lyp/6-31 g(d) level in the gas phase ( $\geq 1\%$ population).....                              | 3  |
| <b>Figure S2.</b> Calculated CD spectra for <b>1</b> at three different levels and the experimental spectrum of <b>1</b> .....                                                          | 3  |
| <b>Figure S3.</b> The optimized, predominant conformers of (3 <i>R</i> , 4 <i>R</i> )- <b>2</b> calculated at the B3lyp/6-31 g(d) level in the gas phase ( $\geq 1\%$ population) ..... | 4  |
| <b>Figure S4.</b> HRESIMS spectrum of <b>1</b> .....                                                                                                                                    | 4  |
| <b>Figure S5.</b> $^1\text{H}$ NMR spectrum of <b>1</b> (DMSO- <i>d</i> <sub>6</sub> , 400 MHz).....                                                                                    | 5  |
| <b>Figure S6.</b> $^{13}\text{C}$ NMR spectrum of <b>1</b> (DMSO- <i>d</i> <sub>6</sub> , 100 MHz).....                                                                                 | 5  |
| <b>Figure S7.</b> HMBC spectrum of <b>1</b> .....                                                                                                                                       | 6  |
| <b>Figure S8.</b> NOESY spectrum of <b>1</b> .....                                                                                                                                      | 6  |
| <b>Figure S9.</b> HRESIMS spectrum of <b>2</b> .....                                                                                                                                    | 7  |
| <b>Figure S10.</b> $^1\text{H}$ NMR spectrum of <b>2</b> (DMSO- <i>d</i> <sub>6</sub> , 400 MHz).....                                                                                   | 7  |
| <b>Figure S11.</b> $^{13}\text{C}$ NMR spectrum of <b>2</b> (DMSO- <i>d</i> <sub>6</sub> , 100 MHz).....                                                                                | 8  |
| <b>Figure S12.</b> HMBC spectrum of <b>2</b> .....                                                                                                                                      | 8  |
| <b>Figure S13.</b> NOESY spectrum of <b>2</b> .....                                                                                                                                     | 9  |
| <b>Figure S14.</b> HRESIMS spectrum of <b>3</b> .....                                                                                                                                   | 9  |
| <b>Figure S15.</b> $^1\text{H}$ NMR spectrum of <b>3</b> (CD <sub>3</sub> OD, 400 MHz).....                                                                                             | 10 |
| <b>Figure S16.</b> $^{13}\text{C}$ NMR spectrum of <b>3</b> (CD <sub>3</sub> OD, 100 MHz).....                                                                                          | 10 |
| <b>Figure S17.</b> HMBC spectrum of <b>3</b> .....                                                                                                                                      | 11 |
| <b>Figure S18.</b> NOESY spectrum of <b>3</b> .....                                                                                                                                     | 11 |
| <b>Figure S19.</b> HRESIMS spectrum of <b>4</b> .....                                                                                                                                   | 12 |
| <b>Figure S20.</b> $^1\text{H}$ NMR spectrum of <b>4</b> (CD <sub>3</sub> OD, 400 MHz).....                                                                                             | 12 |
| <b>Figure S21.</b> $^{13}\text{C}$ NMR spectrum of <b>4</b> (CD <sub>3</sub> OD, 100 MHz).....                                                                                          | 13 |
| <b>Figure S22.</b> HMBC spectrum of <b>4</b> .....                                                                                                                                      | 13 |

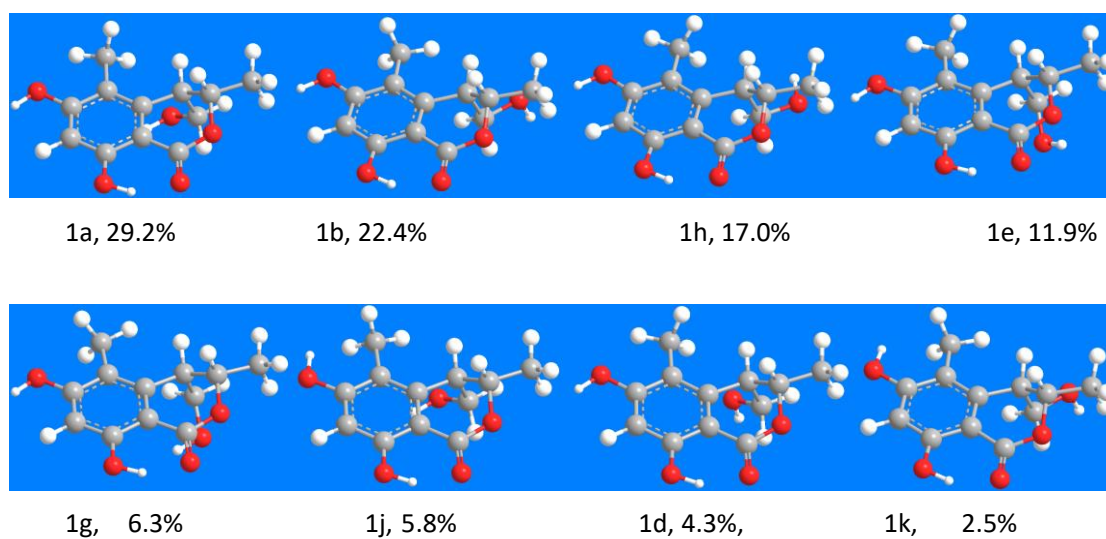

**Figure S1.** The optimized, predominant conformers of **1** calculated at the B3lyp/6-31 g(d) level in the gas phase ( $\geq 1\%$  population)

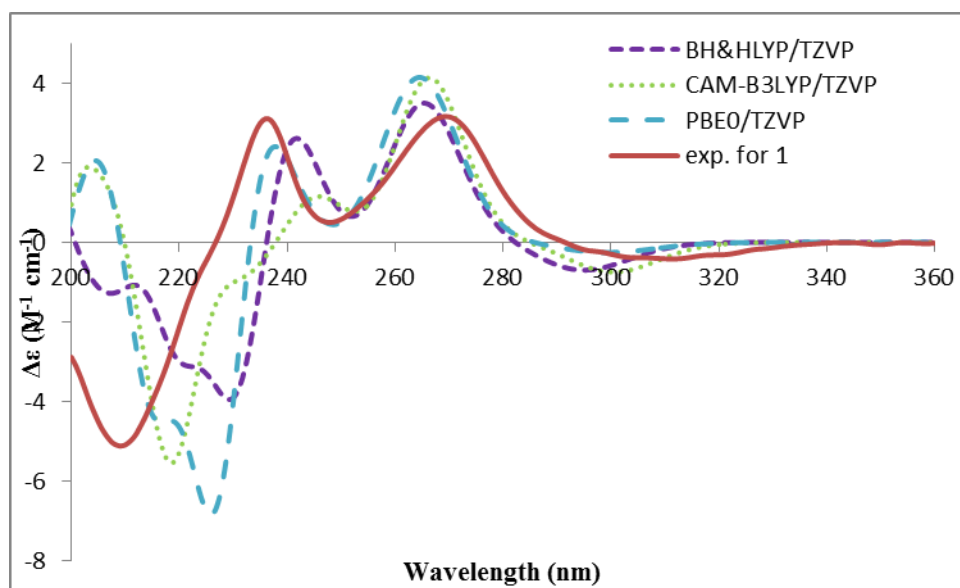

**Figure S2.** Calculated CD spectra for **1** at three different levels and the experimental spectrum of **1**

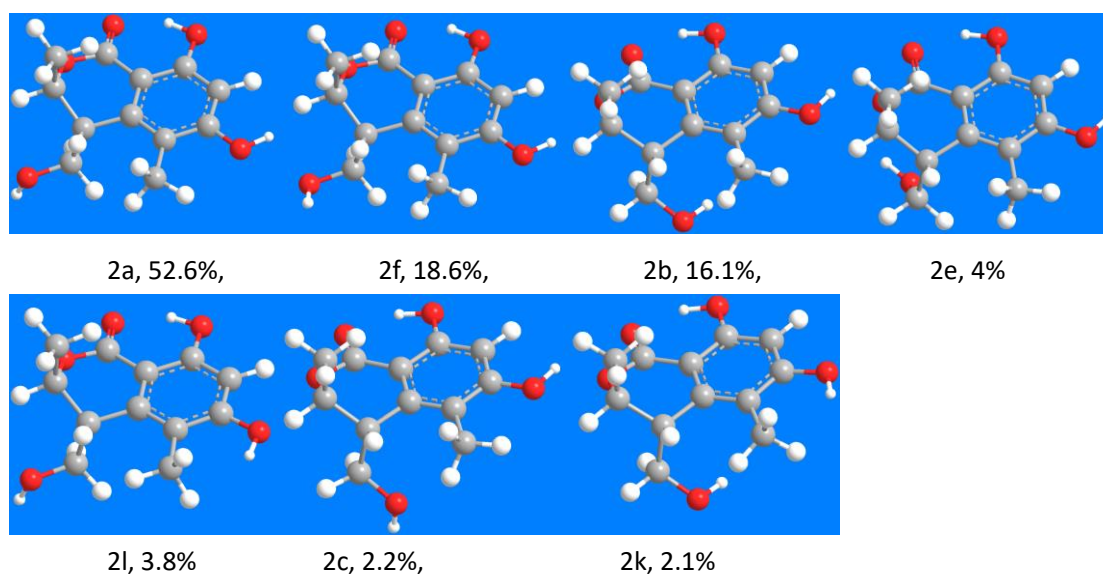

**Figure S3.** The optimized, predominant conformers of (3*R*, 4*R*)-**2** calculated at the B3lyp/6-31 g(d) level in the gas phase ( $\geq 1\%$  population)

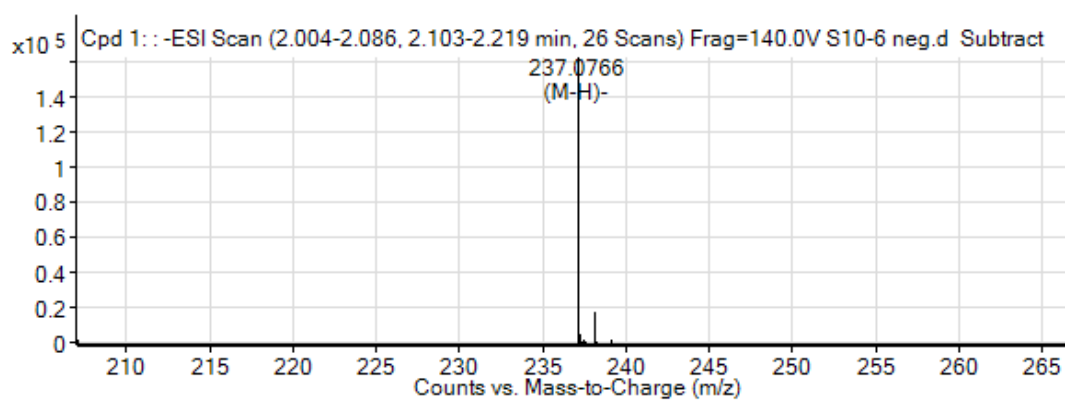

| <i>m/z</i> | <i>Calc m/z</i> | Diff (ppm) | Z  | Abund  | Formula                                        | Ion                |
|------------|-----------------|------------|----|--------|------------------------------------------------|--------------------|
| 237.0766   | 237.0768        | -1.06      | -1 | 162370 | C <sub>12</sub> H <sub>13</sub> O <sub>5</sub> | (M-H) <sup>-</sup> |

**Figure S4.** HRESIMS spectrum of **1**

S10-6

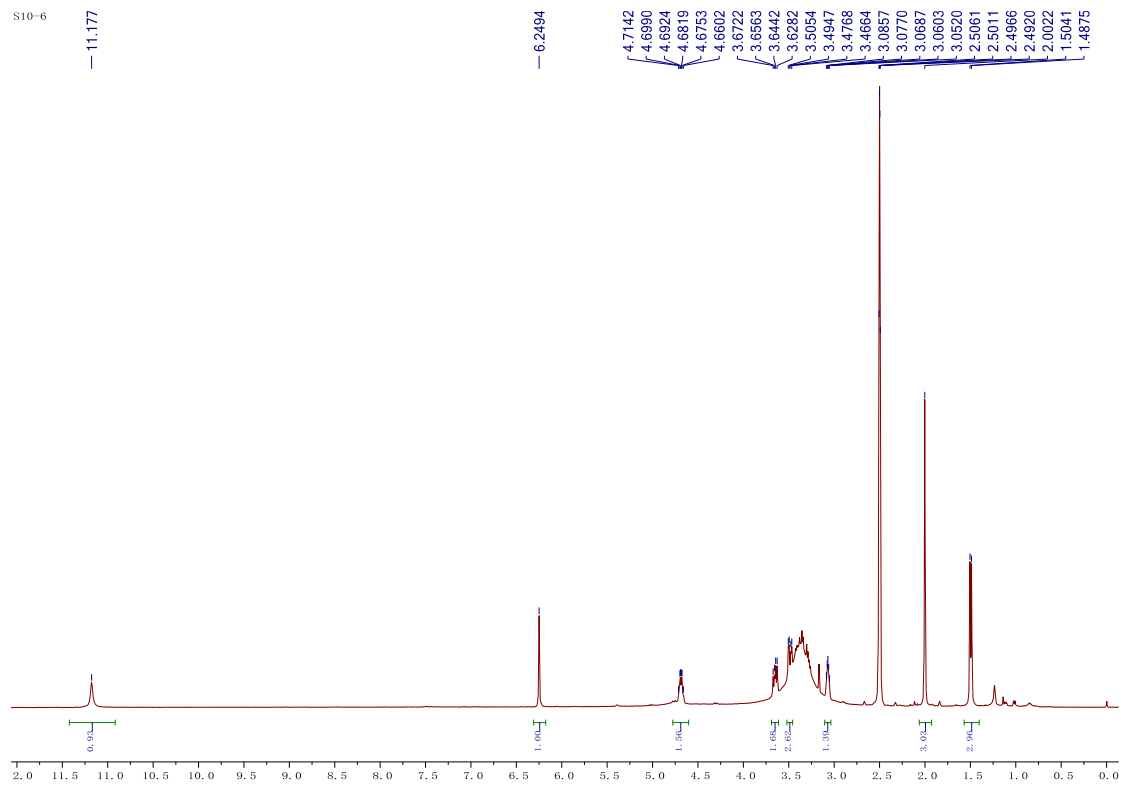

Figure S5.  $^1\text{H}$  NMR spectrum of **1** ( $\text{DMSO-}d_6$ , 400 MHz)

S10-6\_13C

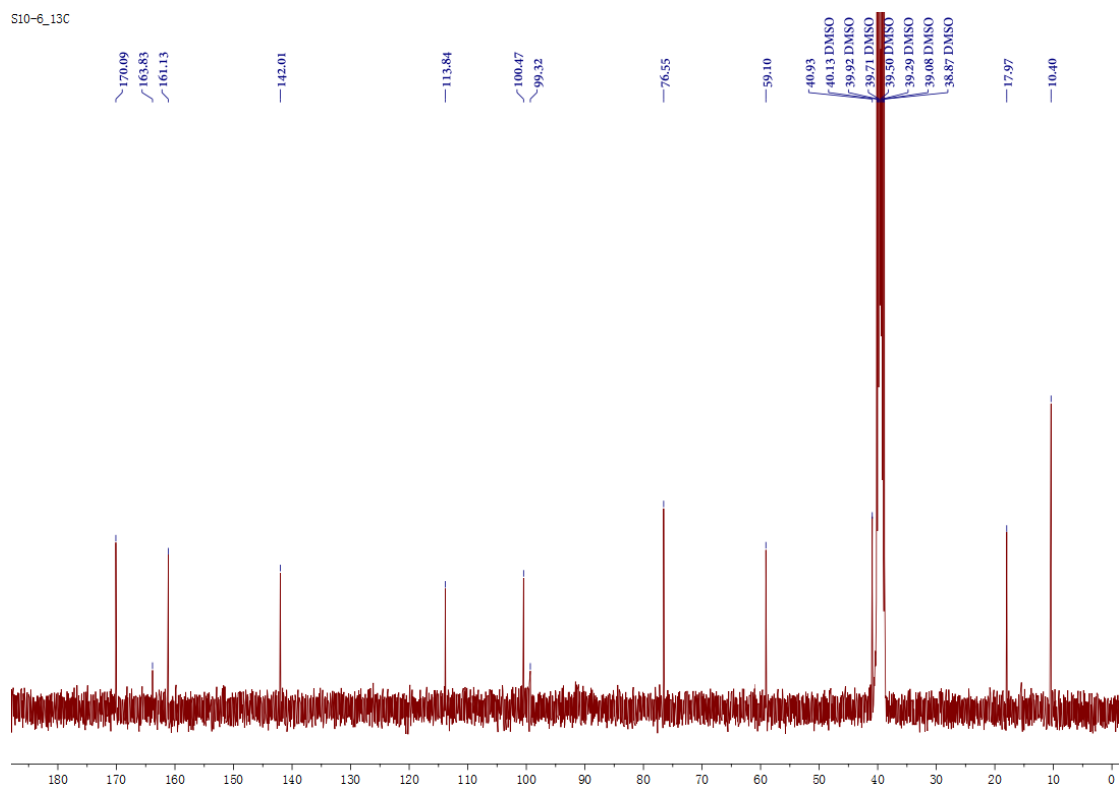

Figure S6.  $^{13}\text{C}$  NMR spectrum of **1** ( $\text{DMSO-}d_6$ , 100 MHz)

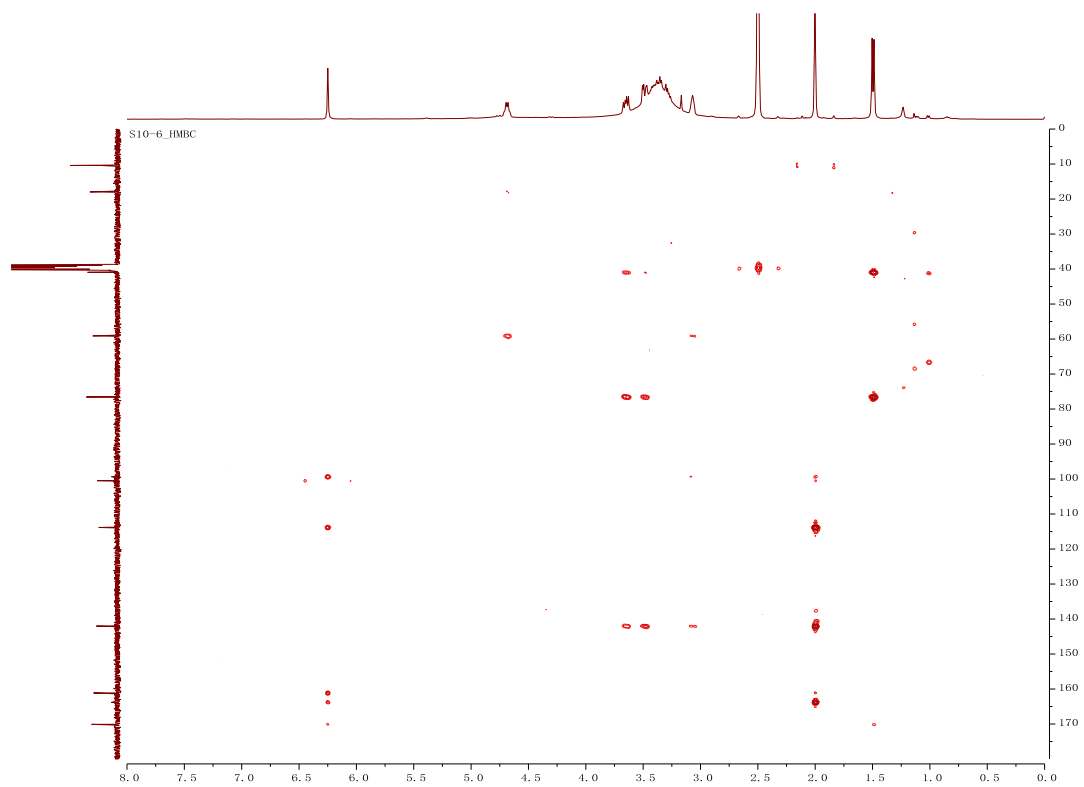

Figure S7. HMBC spectrum of **1**

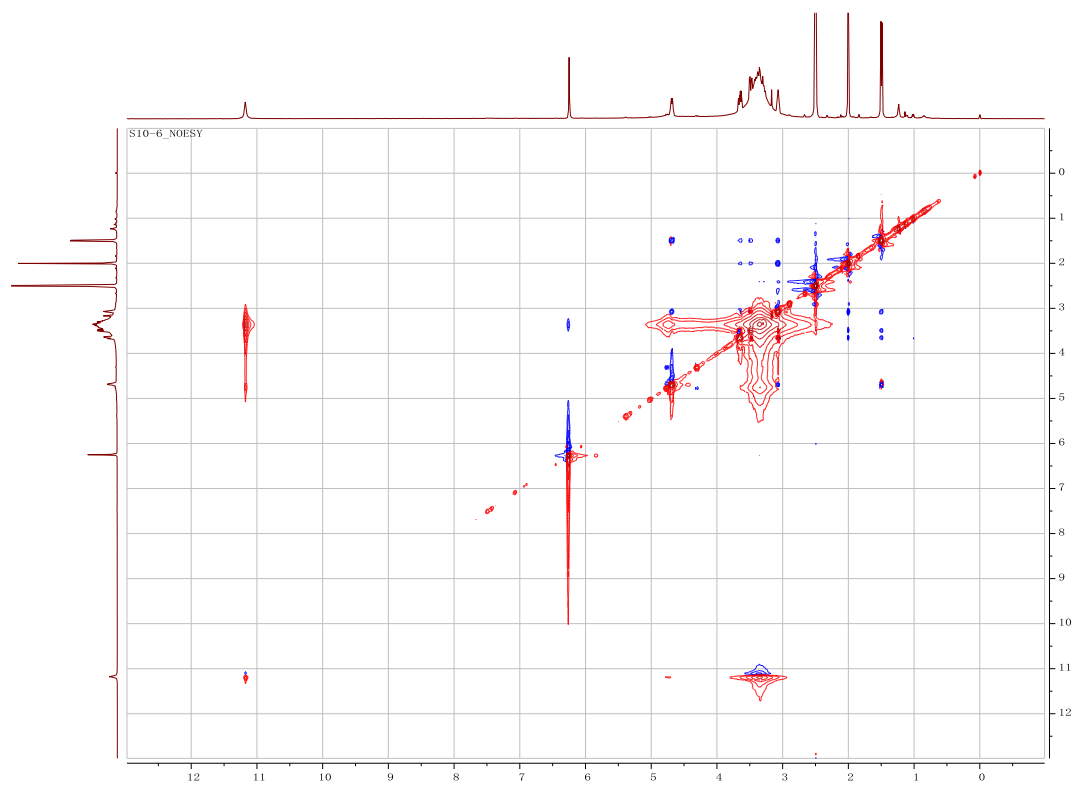

Figure S8. NOESY spectrum of **1**

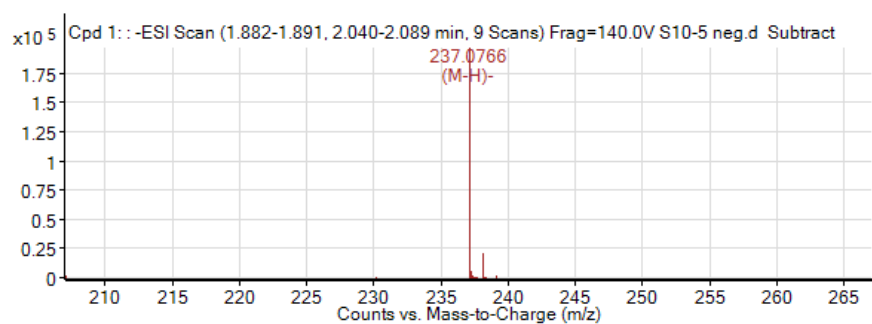

| <i>m/z</i> | <i>Calc m/z</i> | Diff (ppm) | Z  | Abund    | Formula                                        | Ion                |
|------------|-----------------|------------|----|----------|------------------------------------------------|--------------------|
| 237.0766   | 237.0768        | -0.95      | -1 | 197103.5 | C <sub>12</sub> H <sub>13</sub> O <sub>5</sub> | (M-H) <sup>-</sup> |

Figure S9. HRESIMS spectrum of **2**.

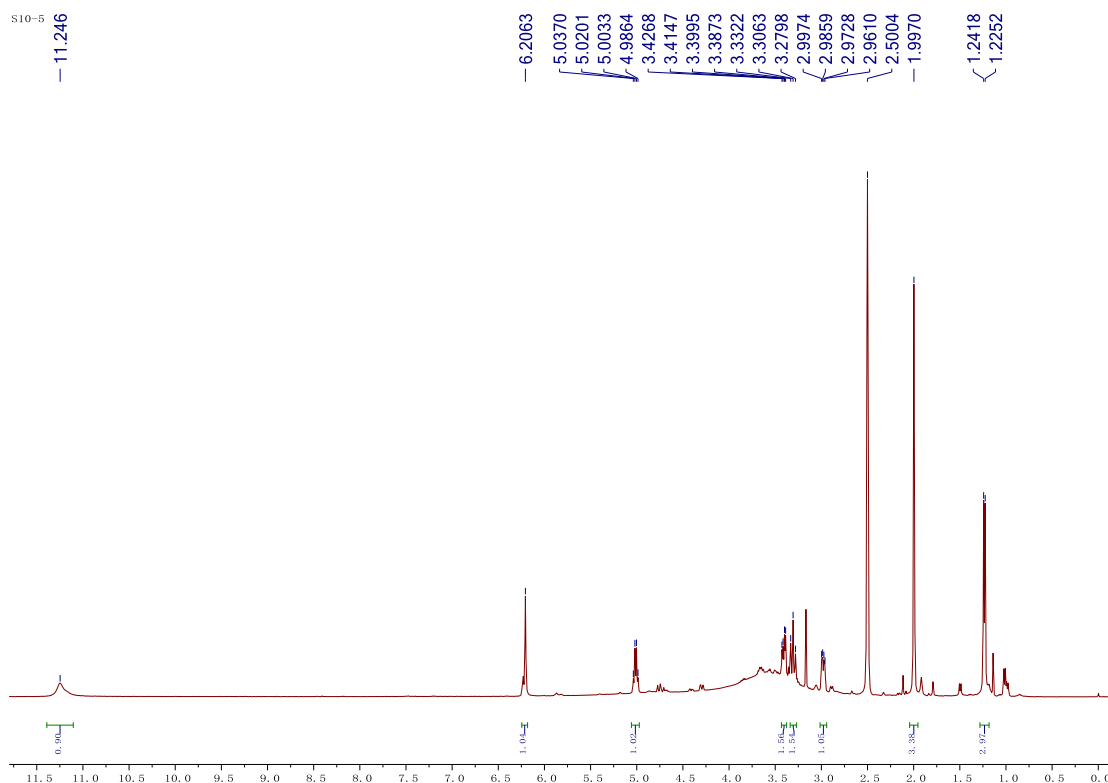

Figure S10. <sup>1</sup>H NMR spectrum of **2** (DMSO-*d*<sub>6</sub>, 400 MHz)

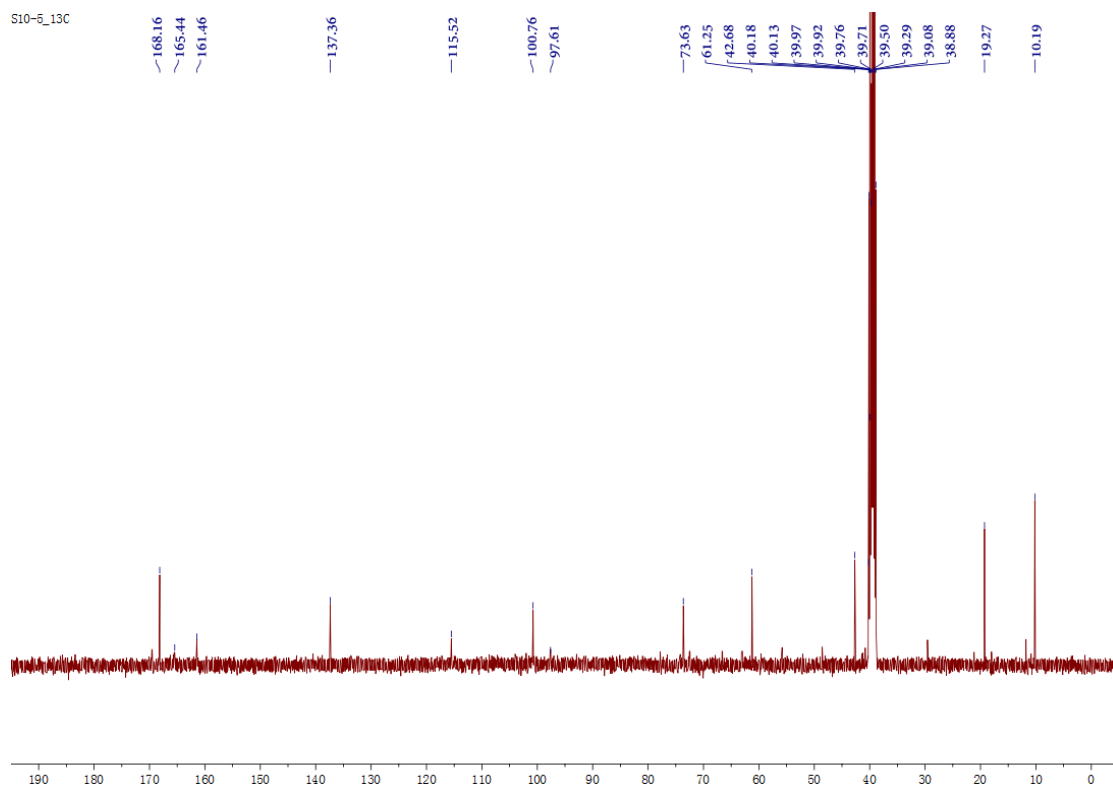

Figure S11.  $^{13}\text{C}$  NMR spectrum of **2** (DMSO- $d_6$ , 100 MHz)

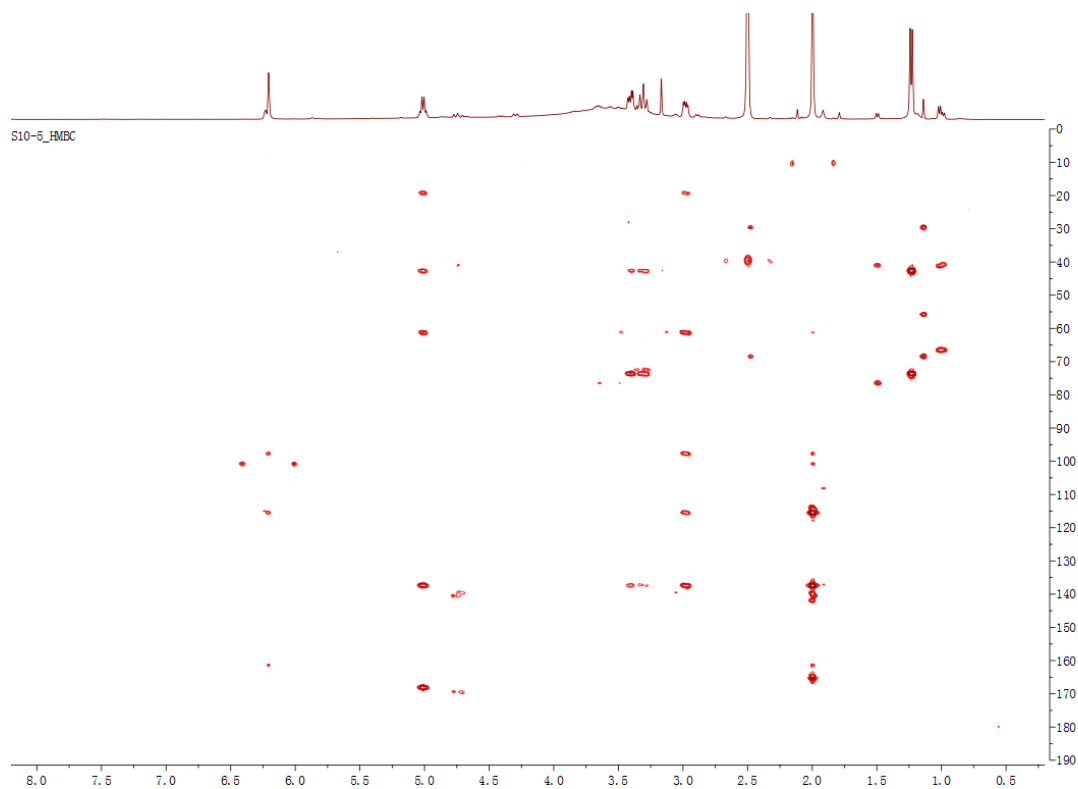

Figure S12. HMBC spectrum of **2**



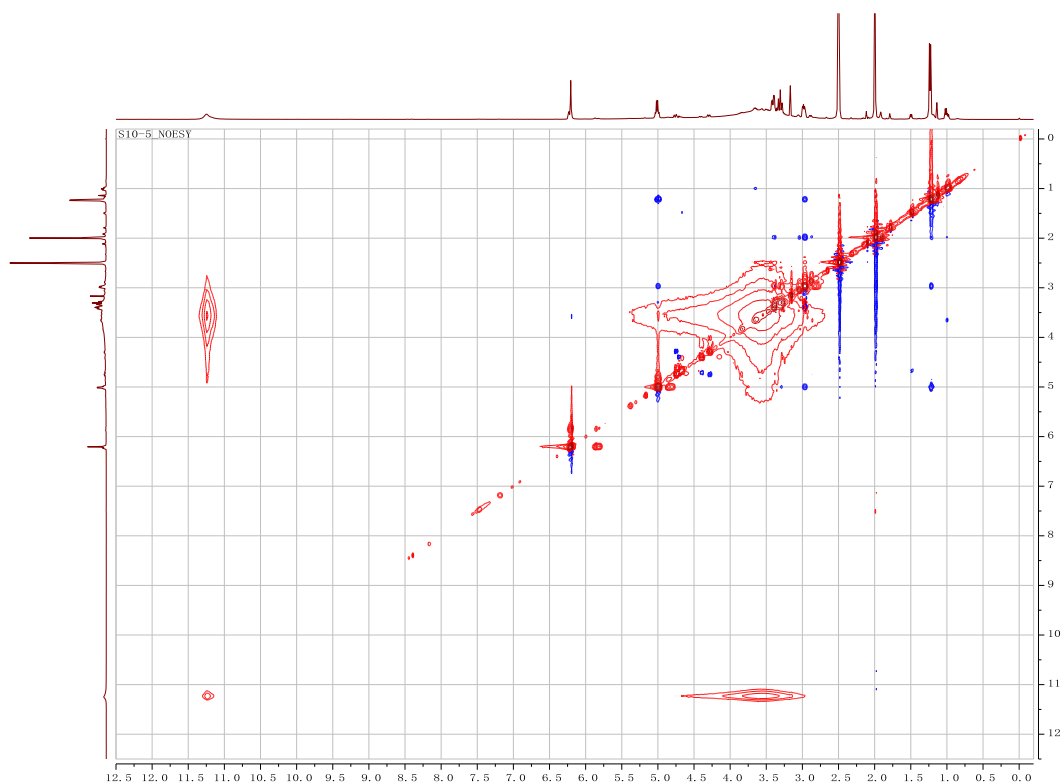

Figure S13. NOESY spectrum of **2**

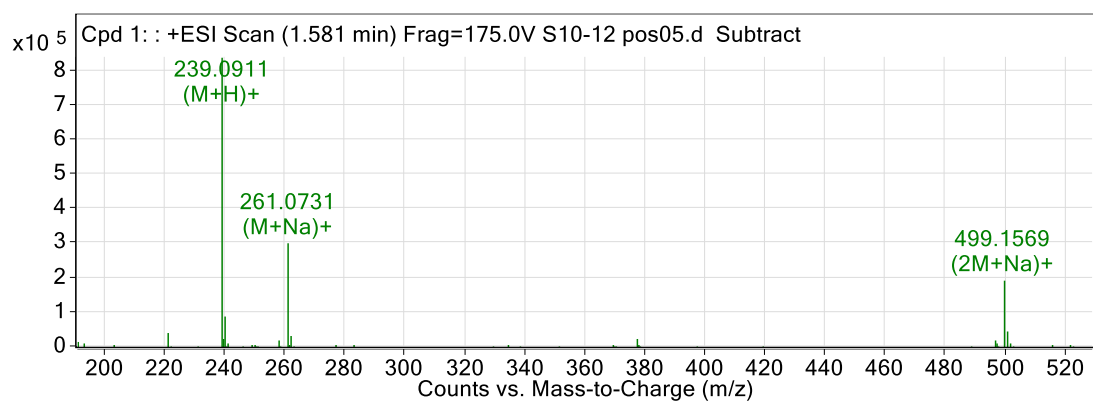

| <i>m/z</i> | <i>Calc m/z</i> | Diff(ppm) | <i>z</i> | Abund    | Formula                                           | Ion                  |
|------------|-----------------|-----------|----------|----------|---------------------------------------------------|----------------------|
| 239.0911   | 239.0914        | -1.19     | 1        | 837256.6 | C <sub>12</sub> H <sub>15</sub> O <sub>5</sub>    | (M+H) <sup>+</sup>   |
| 261.0731   | 261.0733        | -0.77     | 1        | 302155.1 | C <sub>12</sub> H <sub>14</sub> NaO <sub>5</sub>  | (M+Na) <sup>+</sup>  |
| 499.1569   | 499.1575        | -1.06     | 1        | 195147.1 | C <sub>24</sub> H <sub>28</sub> NaO <sub>10</sub> | (2M+Na) <sup>+</sup> |

Figure S14. HRESIMS spectrum of **3**

S10-12

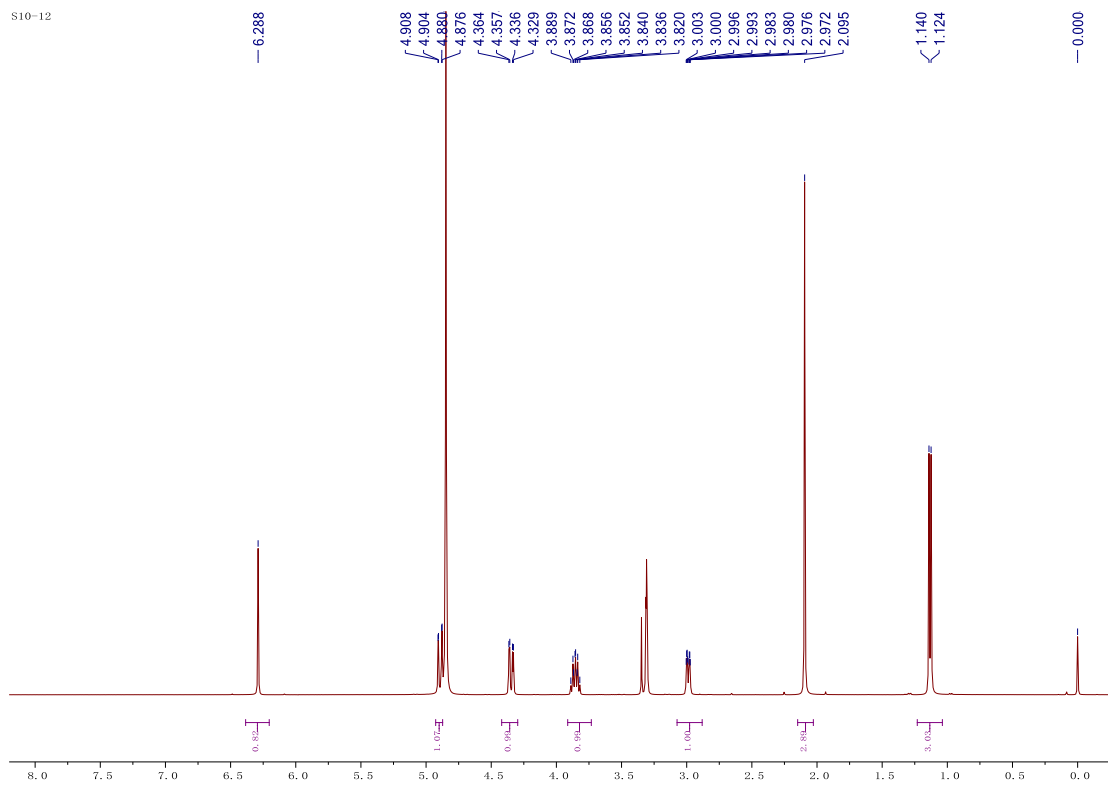

Figure S15.  $^1\text{H}$  NMR spectrum of **3** ( $\text{CD}_3\text{OD}$ , 400 MHz)

S10-12\_13C

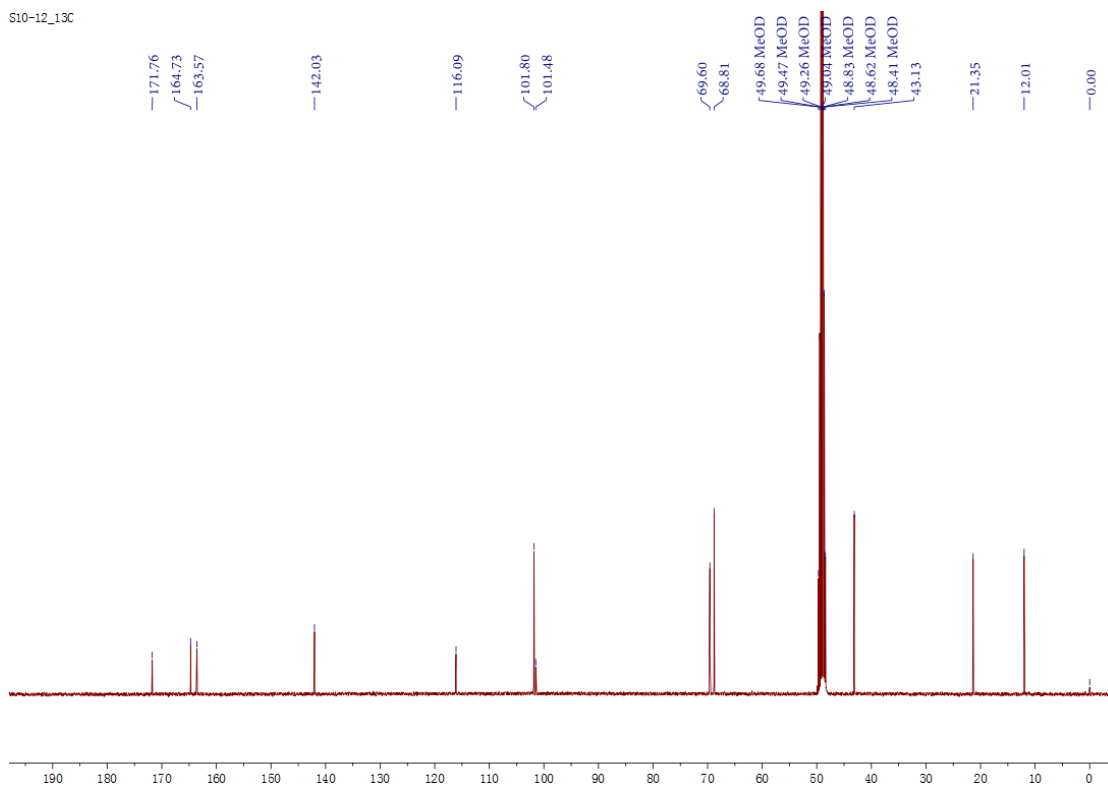

Figure S16.  $^{13}\text{C}$  NMR spectrum of **3** ( $\text{CD}_3\text{OD}$ , 100 MHz)

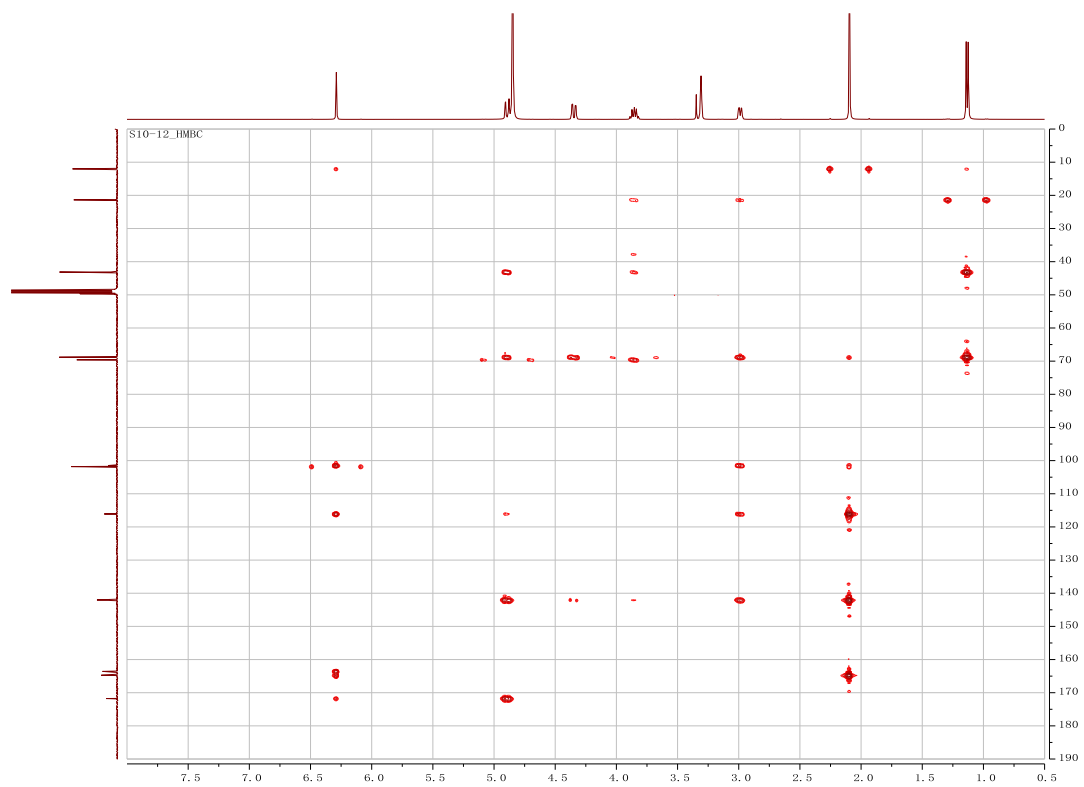

Figure S17. HMBC spectrum of **3**

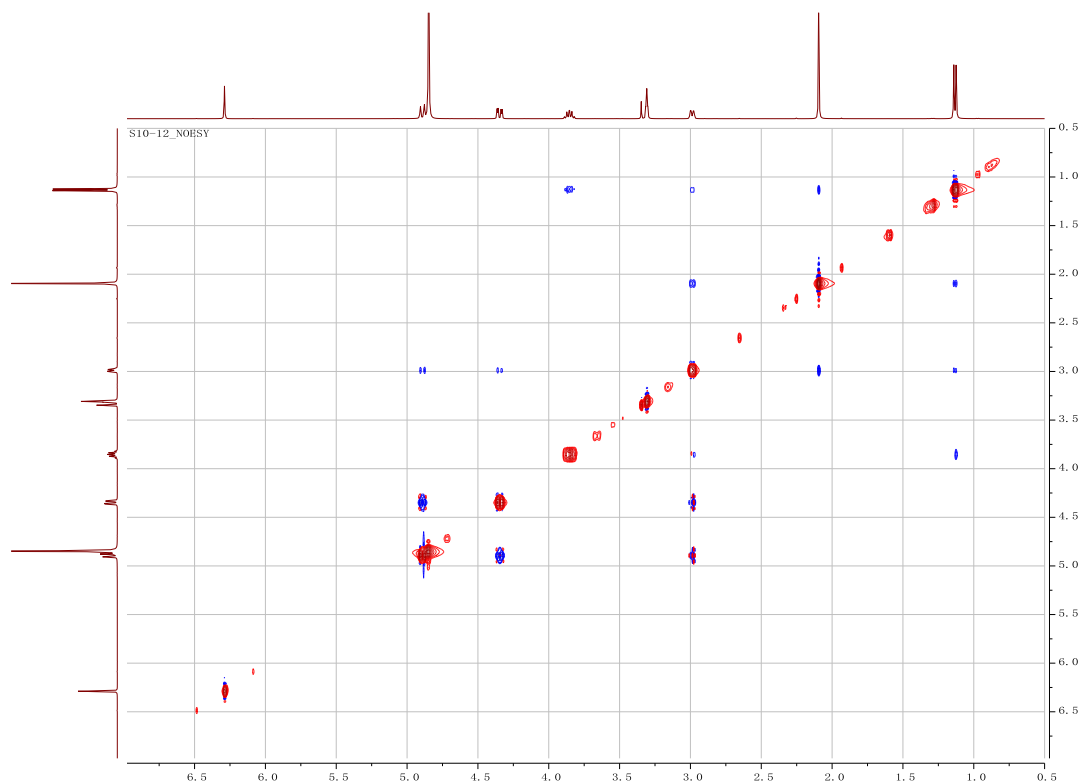

Figure S18. NOESY spectrum of **3**

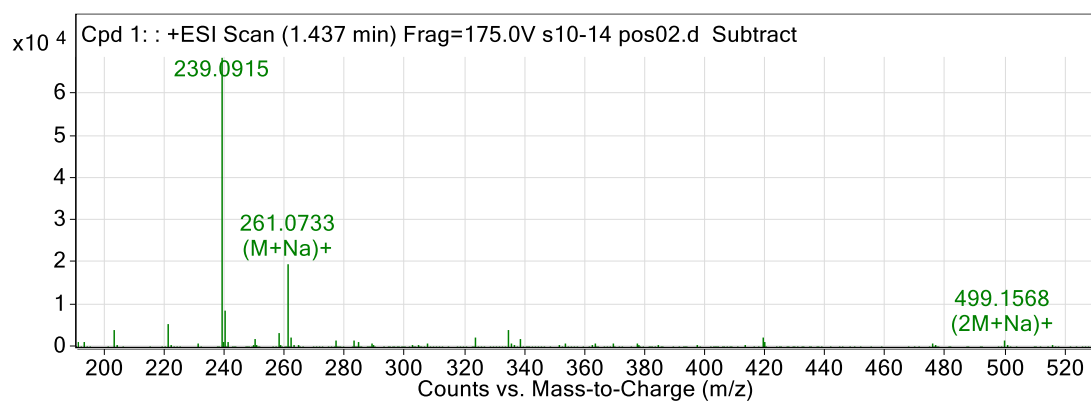

| m/z      | Calc m/z | Diff(ppm) | z | Abund  | Formula                                           | Ion                  |
|----------|----------|-----------|---|--------|---------------------------------------------------|----------------------|
| 239.0915 | 239.0914 | 0.3       | 1 | 68578  | C <sub>12</sub> H <sub>15</sub> O <sub>5</sub>    | (M+H) <sup>+</sup>   |
| 261.0733 | 261.0733 | -0.03     | 1 | 19660  | C <sub>12</sub> H <sub>14</sub> NaO <sub>5</sub>  | (M+Na) <sup>+</sup>  |
| 499.1568 | 499.1575 | -1.26     | 1 | 1805.9 | C <sub>24</sub> H <sub>28</sub> NaO <sub>10</sub> | (2M+Na) <sup>+</sup> |

Figure S19. HRESIMS spectrum of **4**

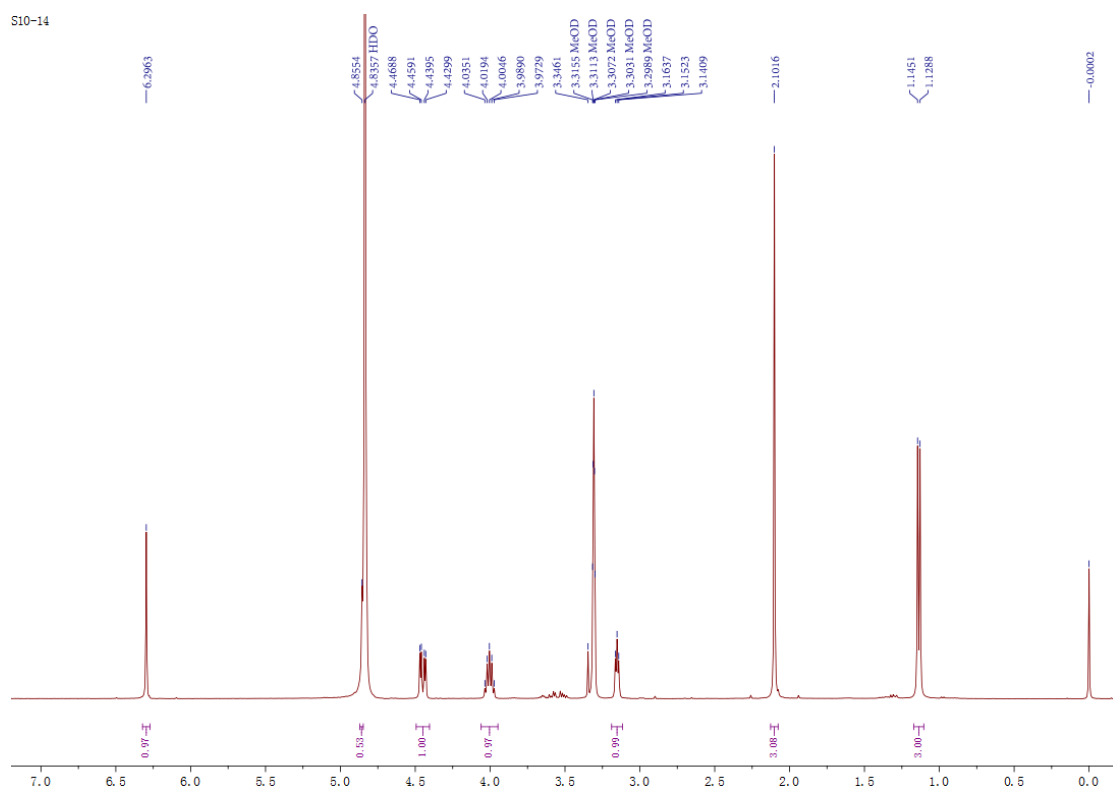

Figure S20. <sup>1</sup>H NMR spectrum of **4** (CD<sub>3</sub>OD, 400 MHz)

S10-14\_13C

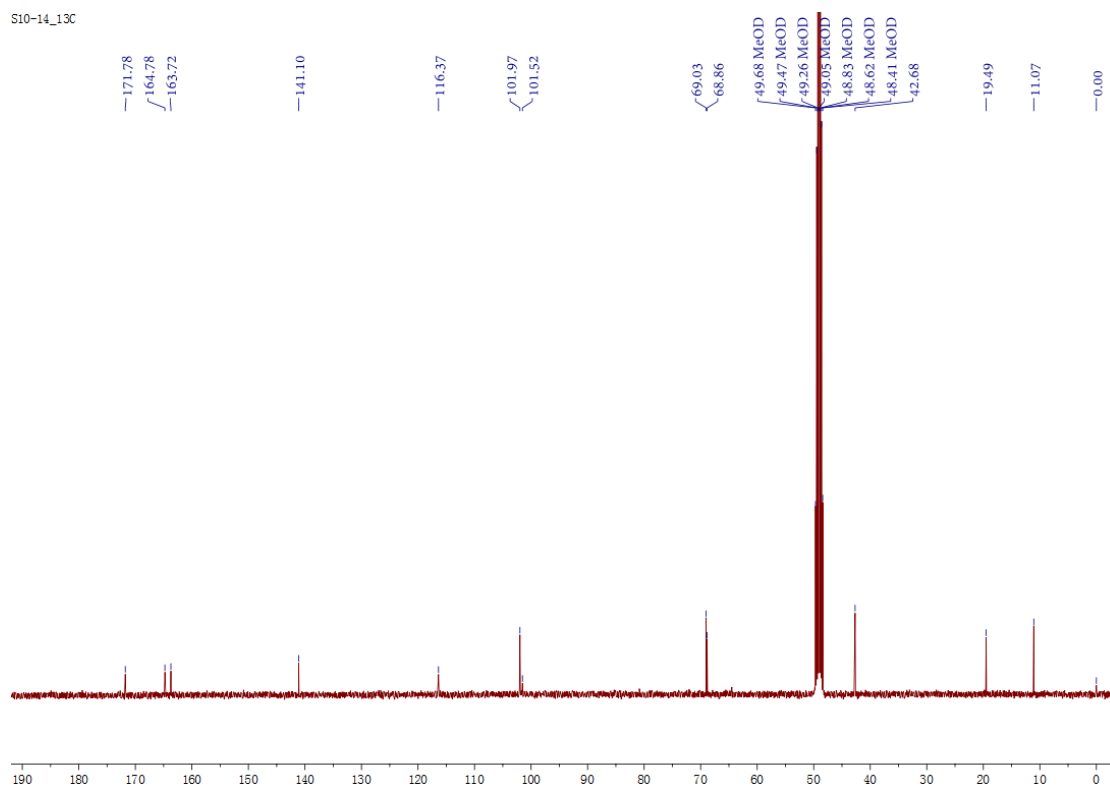

Figure S21.  $^{13}\text{C}$  NMR spectrum of **4** ( $\text{CD}_3\text{OD}$ , 100 MHz)

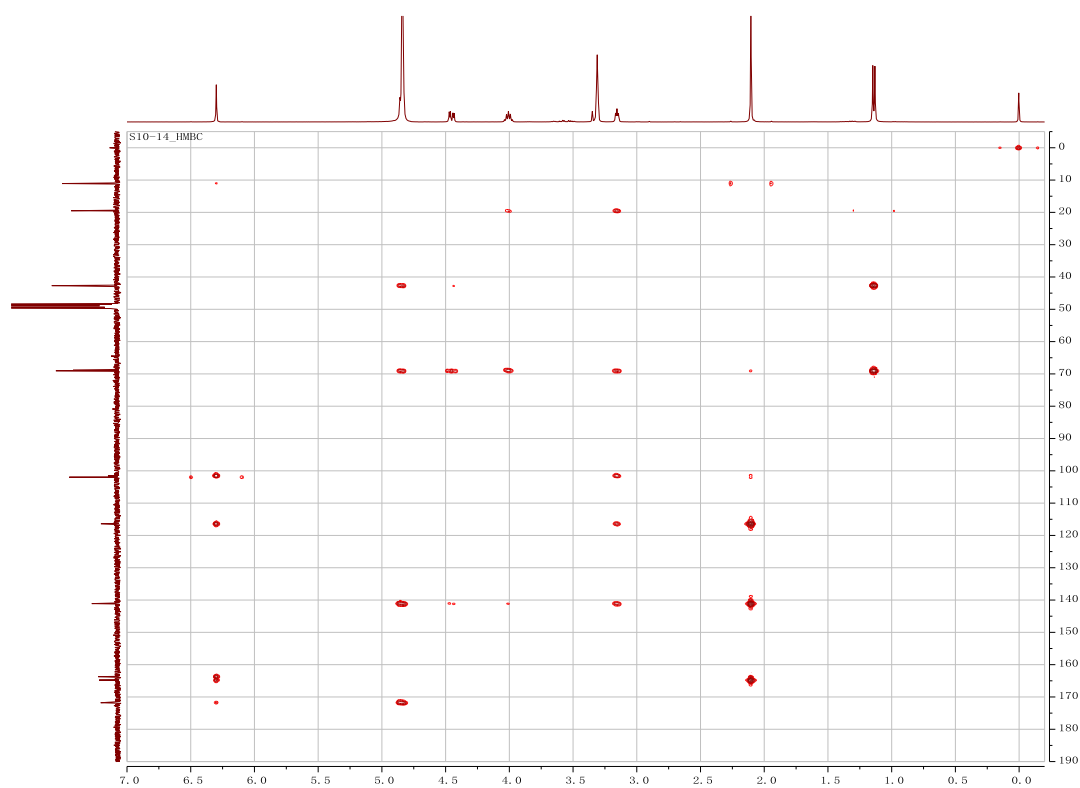

Figure S22. HMBC spectrum of **4**
